### Notice to Contributors.

- 1) All contributions should be type-written, on one side of the paper only.
- 2) Drawings and diagrams for reproduction should be prepared in waterproof Indian Ink (Encre de Chine) on Bristol Board or other perfectly smooth, white paper or card. No erasures should be made. Shading should be limited to the minimum necessary, and when used the shading lines should be kept open. Fine and dotted lines should be drawn boldly.

Lettering should be inserted only in pencil: the block-maker will be responsible for the definitive lettering.

Drawings should if possible be twice the diameter required, and when reduced should occupy a maximum space of 18 cms. in length and 11 cms. in width, including the space for the legend. The shape should be such as to fit easily into the page.

The size to which drawings are to be reduced should be noted in pencil on the originals.

When several illustrations are required for the same article they may be drawn on the same sheet, allowing at least 5 cms. between them.

Charts and curves may be drawn to advantage on graph-paper ruled in pale blue lines, as these lines do not appear in photographic reproduction.

Legends for figures should be type-written on a separate sheet.

- 3) For satisfactory reproduction of photographs a good glossy bromide print is required, and all added matter, such as reference letters, arrows, numbers etc., should be drawn on the face of the photograph or indicated on tracing paper attached to the back of the print and folded over the front. If matter is written on the face of the photograph a duplicate print without the added matter should be supplied.

Legends should be written on the back of the photographs, or type-written on a separate sheet.
